# Supplementary material for: Efficient catalytic oxidation of alcohol to carbonyl compounds over CoFe hydrotalcites
Source: Royal Society of Chemistry journal article supplement (doi:10.1039/c6ra18356e), 2016-01-01
Supplement: c6ra18356e1.pdf [file c6ra18356e1.pdf]

## Efficient catalytic oxidation of alcohol to carbonyl compounds over CoFe hydrotalcites

Weiyou Zhou, Jiugao Pan, Zhong Wu, Junfeng Qian, Mingyang He, Qun Chen

*Jiangsu Key Laboratory of Advanced Catalytic Materials and Technology, Changzhou University, Changzhou 213164, China*

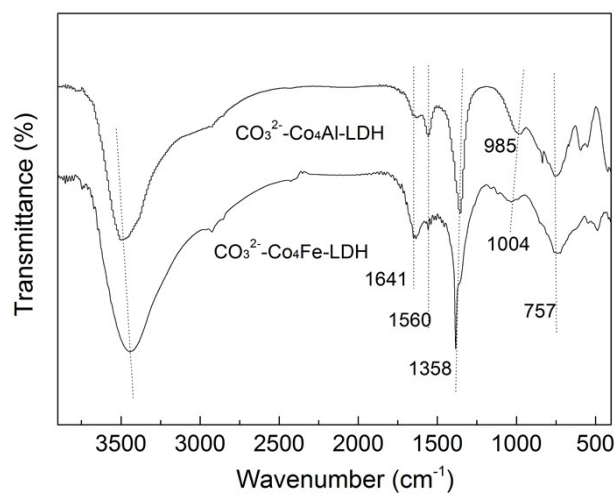

**Fig. S1.** FTIR spectra of  $\text{CO}_3^{2-}\text{-Co}_4\text{Fe-LDH}$  and  $\text{CO}_3^{2-}\text{-Co}_4\text{Al-LDH}$

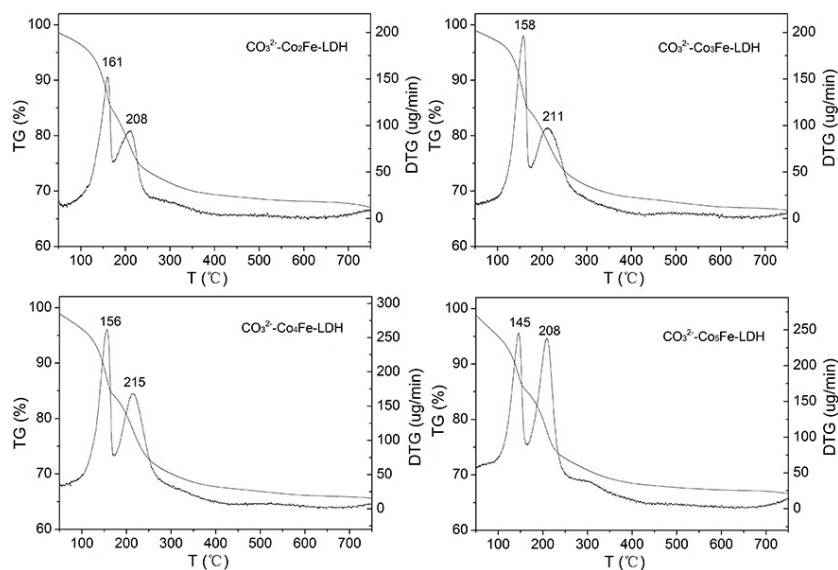

**Fig. S2.** TG/DTG curves of  $\text{CO}_3^{2-}\text{-Co}_x\text{Fe-LDHs}$  ( $x=2, 3, 4$  and  $5$ )

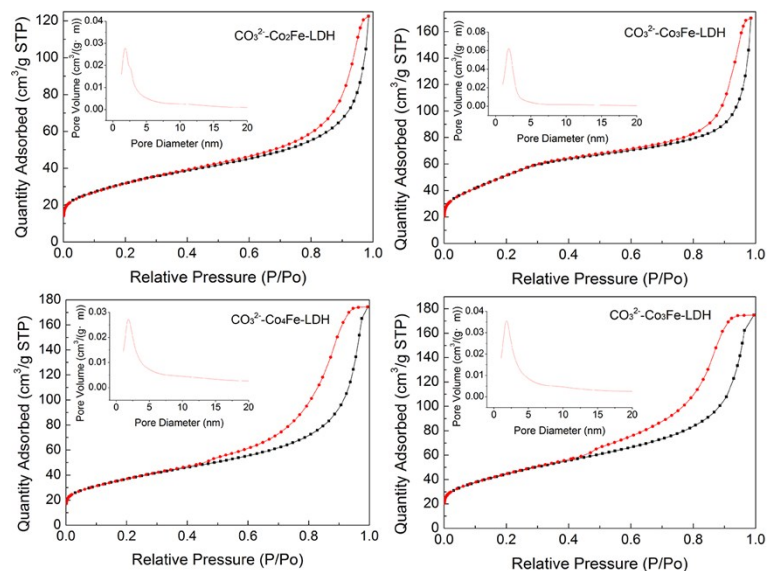

**Fig. S3.**  $N_2$  adsorption/desorption isotherms and pore size distribution (inserted picture) of  $CO_3^{2-}-Co_xFe-LDH$ s

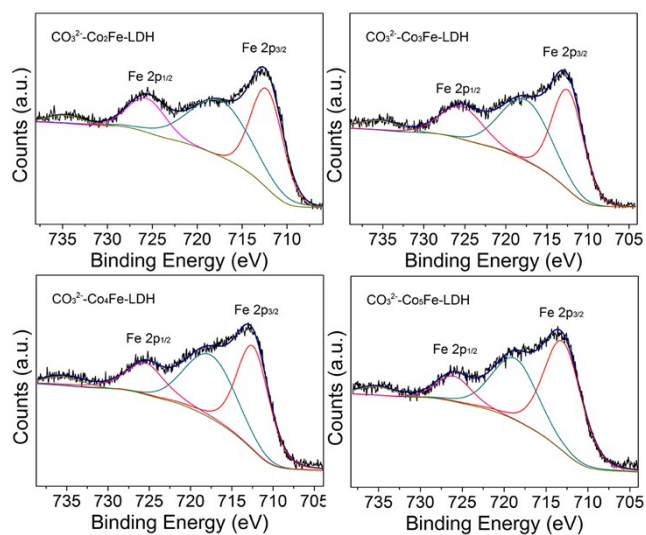

**Fig. S4.** The Fe 2p XPS spectra of  $CO_3^{2-}-Co_xFe-LDH$ s ( $x=2, 3, 4$  and  $5$ )

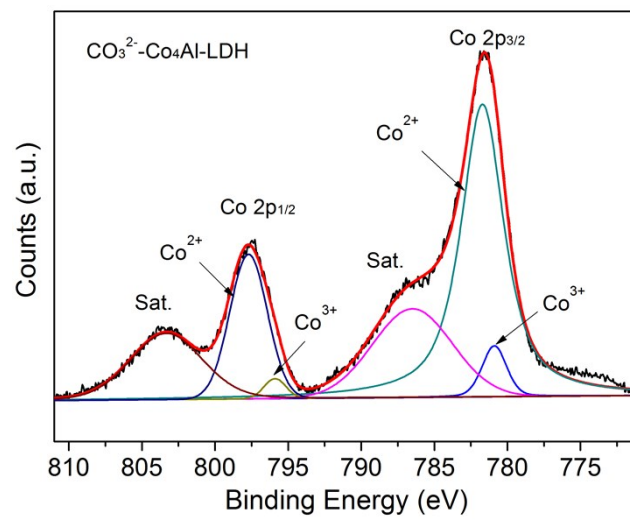

**Fig. S5.** The Co 2p XPS spectra of  $\text{CO}_3^{2-}\text{-Co}_4\text{Al-LDHs}$

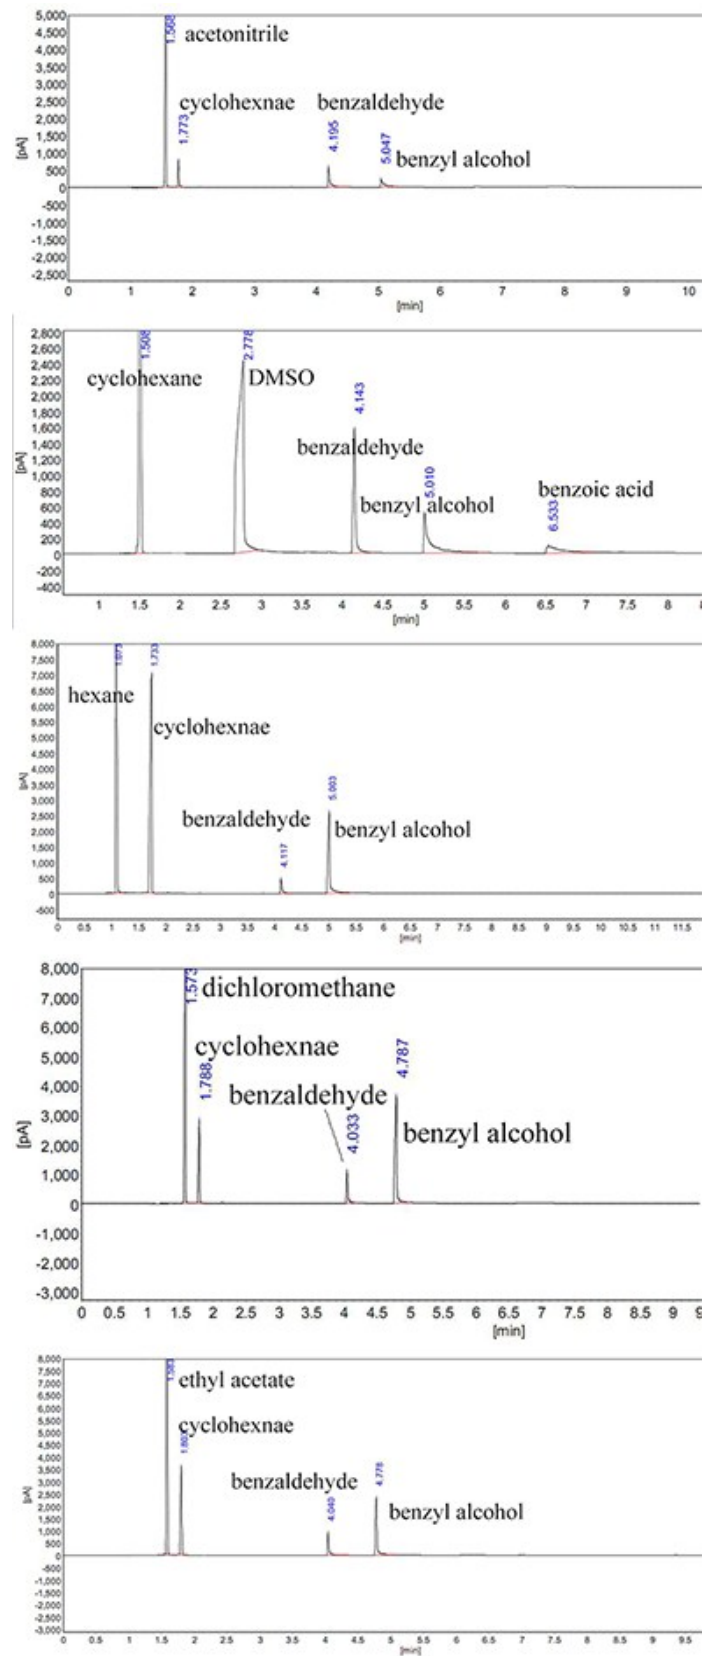

**Fig. S6.** The GC graph analysis of the oxidation of benzyl alcohol with different solvent

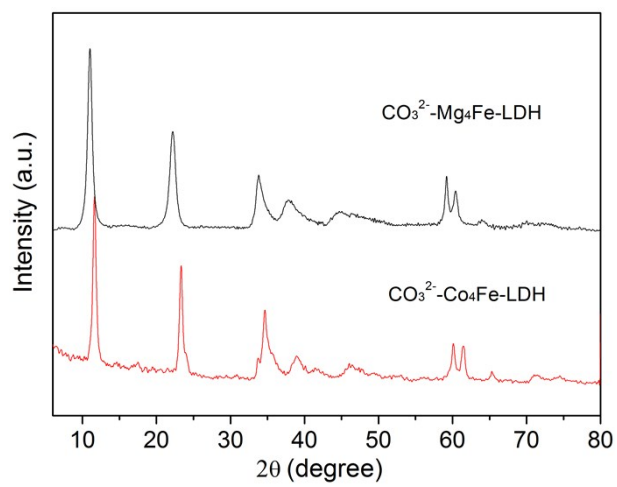

**Fig. S7.** XRD patterns of  $\text{CO}_3^{2-}\text{-Co}_4\text{Al-LDH}$  and  $\text{CO}_3^{2-}\text{-Mg}_4\text{Al-LDH}$

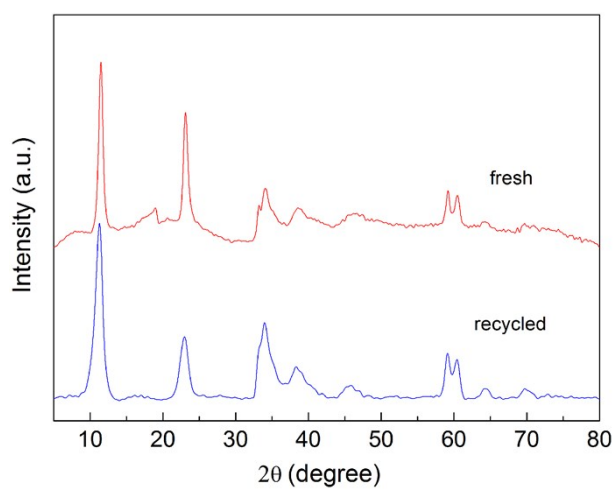

**Fig. S8.** The XRD pattern of recycled  $\text{CO}_3^{2-}\text{-Co}_4\text{Fe-LDH}$

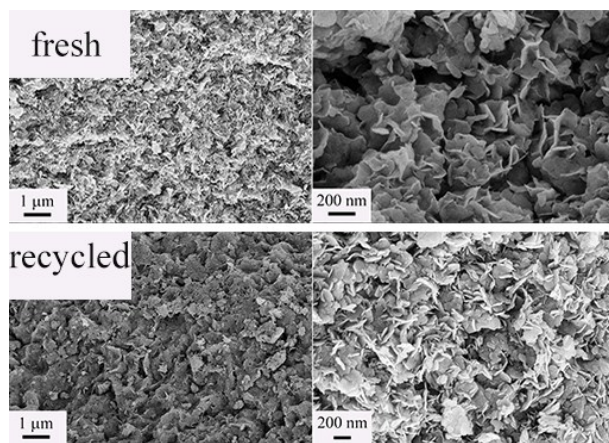

**Fig. S9.** SEM images of recycled  $\text{CO}_3^{2-}\text{-Co}_4\text{Fe-LDH}$
